# Supplementary material for: Noncoding RNA Transcripts during Differentiation of Induced Pluripotent Stem Cells into Hepatocytes
Source: Stem Cells Int. 2018 Aug 19;2018:5692840. doi: 10.1155/2018/5692840 (PMC6120260; doi:10.1155/2018/5692840)
Supplement: Supplementary Materials — Figure 1: statistics of RNASeq. (A) Total number of sequenced reads, reads after clipping, and mapped reads; both symbolised all reads obtained after sequencing. The bar showing clipped reads contains reads that could be processed by cutting the helper sequences. Mapped read bar shows reads aligned to a reference genome. Clipped and mapped reads are divided into reads containing an adapter (length below 50 nt) and reads that do not contain an adapter (length ≥ 50 nt). (B) Percentage of mapped reads with an adapter; mapped reads of miRNA and snoRNA are divided into reads containing an adapter (length below 50 nt) and reads that do not contain an adapter (length ≥ 50 nt); HLCd20 and HLCd24 show reads from HLC day 20 and HLC day 24, respectively, of differentiation, in comparison to reads from hepatocytes. Figure 2: percentage of different transcript types in the sequencing; identified ncRNA without miRNA and snoRNA transcripts which were successfully mapped and overlapped genome annotations. HLCd20 and HLCd24 show transcripts from HLC day 20 and HLC day 24, respectively, of differentiation, in comparison to transcripts from hepatocytes. Table 1: list of differentially expressed miRNA and snoRNA. Table 2: conservation of snoRNA candidates. [file 5692840.f1.zip]

Archive with 2 entries (2 files):
- Supplementary Materials (fig1, fig2, table 2).docx
- Copy of differentially_expressed_genes_SCI_2357519.xlsx
