# Supplementary material for: Noncoding RNA Transcripts during Differentiation of Induced Pluripotent Stem Cells into Hepatocytes
Source: Stem Cells Int. 2018 Aug 19;2018:5692840. doi: 10.1155/2018/5692840 (PMC6120260; doi:10.1155/2018/5692840)
Supplement: Supplementary Materials — Figure 1: statistics of RNASeq. (A) Total number of sequenced reads, reads after clipping, and mapped reads; both symbolised all reads obtained after sequencing. The bar showing clipped reads contains reads that could be processed by cutting the helper sequences. Mapped read bar shows reads aligned to a reference genome. Clipped and mapped reads are divided into reads containing an adapter (length below 50 nt) and reads that do not contain an adapter (length ≥ 50 nt). (B) Percentage of mapped reads with an adapter; mapped reads of miRNA and snoRNA are divided into reads containing an adapter (length below 50 nt) and reads that do not contain an adapter (length ≥ 50 nt); HLCd20 and HLCd24 show reads from HLC day 20 and HLC day 24, respectively, of differentiation, in comparison to reads from hepatocytes. Figure 2: percentage of different transcript types in the sequencing; identified ncRNA without miRNA and snoRNA transcripts which were successfully mapped and overlapped genome annotations. HLCd20 and HLCd24 show transcripts from HLC day 20 and HLC day 24, respectively, of differentiation, in comparison to transcripts from hepatocytes. Table 1: list of differentially expressed miRNA and snoRNA. Table 2: conservation of snoRNA candidates. [file 5692840.f1.zip › Copy of differentially_expressed_genes_SCI_2357519.xlsx]

## Sheet: Arkusz1
d20/d24	logFC	FDR
miR-199b-3p	2.55812354763446	8.93547142545201e-08
miR-199a-3p	2.53896183503528	8.93547142545201e-08
miR-199b-5p	2.32962716980466	6.51770142725563e-07
miR-199a-5p	2.52734195399273	2.88964509997411e-07
miR-211-5p	3.45230830884167	2.09457212914188e-05
miR-214-5p	2.35153945384058	1.50222482885997e-05
miR-3120-3p	2.5522624343964	0.000111498599467147
miR-367-3p	-2.05075871724011	5.13653107591251e-05
miR-302a-3p	-2.05764245335675	1.30607035453874e-05
miR-302d-5p	-2.49694001680651	0.000911698929082175
d20/Hep	logFC	FDR
miR-6515-3p	6.07588170300708	9.90758869687756e-08
miR-4662a-5p	4.04432084178778	9.69480360127821e-10
let-7a-3p	6.71952193368195	9.52704543184789e-13
miR-195-5p	4.12137760257483	9.34724593351093e-15
miR-4510	7.30373774014933	8.94418011628098e-20
miR-152-3p	4.44120155474557	8.37791442243857e-24
let-7e-5p	2.59474794610106	8.30580464037887e-09
miR-215-5p	5.70847444169248	8.13936003018361e-31
miR-6723-5p	6.73270711671025	8.04436658396246e-28
miR-3609	4.54250120377763	7.90640758746791e-18
miR-26b-5p	3.02292423549193	7.56810461001013e-14
miR-185-5p	2.02224056822275	7.30738980266095e-05
miR-455-3p	2.41912840080963	7.08005459281007e-08
miR-3591-5p	6.10157254420532	7.07773698562517e-19
let-7a-5p	7.71049103108378	7.02538952089314e-45
miR-148a-3p	3.91024335063131	6.72690390794418e-20
miR-99a-3p	5.4115892235748	6.71996817806664e-24
let-7f-5p	8.82250719537618	6.60716489286525e-59
miR-4751	8.15909993944141	6.44001476193596e-09
miR-5589-5p	7.11716776352313	6.22315610056514e-05
miR-101-3p	4.46761909259315	6.00346594516371e-26
miR-4686	7.4560152595105	5.99202075978124e-06
miR-122-3p	5.84068214568441	5.93206438975279e-33
miR-378a-5p	4.50797423265339	5.83727270650107e-13
let-7d-3p	5.7795396088756	5.82745066026891e-14
miR-193b-3p	2.60446516157458	5.58792812305124e-10
miR-6087	3.05779838932167	5.28865422557724e-08
let-7b-3p	7.43485237409799	5.22719937973551e-22
miR-3653-3p	2.86329965724002	4.98533877398172e-10
miR-22-3p	2.94455902671972	4.86646664708171e-13
miR-193b-5p	4.1382186768634	4.6742513218745e-09
miR-3591-3p	7.05948231490521	4.41961385496125e-07
miR-101-3p	4.50571521822103	4.25239649010442e-26
miR-21-3p	2.14070112997868	4.02033764475066e-08
miR-27b-3p	3.34962813586263	4.01376551709028e-17
miR-192-3p	5.43845837469622	3.95498516242344e-16
miR-574-3p	2.06916030403176	3.93558574144105e-06
miR-107	2.7568234242793	3.9242715100358e-12
miR-1248	7.6976991762436	3.79716047577698e-44
miR-24-3p	2.32626759056271	3.6920223252784e-08
miR-195-3p	5.17948742569987	3.53525648696329e-07
let-7c-5p	7.36514464561691	3.34555177074756e-28
miR-22-5p	2.31389142785938	3.32551157024822e-05
miR-29b-3p	5.15896658275354	3.24564104775434e-17
miR-146b-3p	4.45471937869807	3.15863502661111e-18
miR-146b-5p	4.60687555311188	3.12373618093632e-24
miR-30e-3p	2.36917430871509	3.11112719441576e-09
miR-100-5p	4.95411366632267	3.01573259716081e-19
miR-192-5p	5.27488909505053	2.88065869784465e-30
miR-98-5p	8.16911776367701	2.8315894652591e-47
miR-122-5p	6.77056721517526	2.75093802924706e-37
let-7f-5p	8.79622836651184	2.56363169628313e-59
miR-1295b-5p	3.76112394852741	2.53498997860523e-06
miR-194-5p	5.42304631664112	2.5210201596804e-35
miR-497-5p	3.44977890777759	2.3465455268231e-10
let-7g-5p	8.77718423948519	2.33720357812329e-45
miR-194-5p	5.01179008034658	2.31095045914412e-31
miR-29b-3p	5.20168179029221	2.25031853848804e-17
miR-885-3p	5.46608500698868	2.20920766440865e-05
miR-378d	8.45190111639454	2.11484554647933e-10
miR-125b-5p	4.18075538452329	2.07523843831449e-15
miR-3607-5p	2.42785657623709	1.98789706592997e-07
miR-194-3p	5.61866125381301	1.9452460271424e-29
let-7a-3p	6.69879582971764	1.88577567014655e-12
miR-29c-5p	5.70184176701916	1.88269524641621e-12
miR-125b-2-3p	4.2058789794583	1.82311270783079e-22
miR-33b-5p	4.72570659695031	1.80584264717679e-16
miR-618	4.06523878625562	1.73002961232866e-07
miR-99a-5p	4.32669409957207	1.71177859481964e-20
miR-3653-5p	3.42794357429473	1.68695888007764e-06
miR-29c-3p	5.55222533229521	1.63931671784197e-25
miR-378d	8.06323265710759	1.55091252847008e-08
miR-4662b	4.38982300530225	1.53527068110537e-10
miR-378c	6.61339154114338	1.50911380860531e-36
miR-499b-3p	3.30721459143408	1.496358095821e-05
miR-499a-5p	3.30721459143408	1.48608818559764e-05
miR-29a-3p	4.84076011464723	1.44942528283496e-23
miR-23b-3p	3.37874352081452	1.44923908296646e-16
let-7f-2-3p	5.45138263674009	1.37952703891725e-08
miR-125b-5p	4.19482921125767	1.35489761129854e-15
let-7b-5p	10.558246576892	1.32700958509587e-61
miR-3607-3p	2.60912761754722	1.28487524768636e-06
miR-378a-3p	5.58328549636709	1.2754872323248e-37
miR-148a-5p	2.37910540156291	1.27375094266594e-08
miR-193a-5p	3.93055799644523	1.26980903014914e-15
miR-1295a	3.36833201136502	1.25645378831831e-05
let-7i-5p	7.74634876813383	1.25467045038785e-45
miR-24-3p	2.25024553588259	1.2001938888129e-07
let-7d-5p	8.38596246998463	1.19436559236013e-41
miR-885-5p	8.87012886175281	1.17965229192127e-24
miR-378b	5.23812059091704	1.17007661786919e-07
miR-365b-3p	2.07304691208188	1.00086818928877e-05
miR-365a-3p	2.07304691208188	1.00086818928877e-05
let-7g-3p	4.84305079537838	0.000846909199349772
miR-548ah-5p	2.48612208588965	0.000808886212698847
miR-3074-5p	2.5713890794163	0.000749710971055656
miR-98-3p	4.96740338754639	0.00073882252152694
miR-378f	5.37919561867866	0.000377503964565241
miR-612	6.91231474955727	0.000316789693905945
miR-3613-5p	2.7650681802373	0.000185212377531704
miR-5588-5p	4.30046472918977	0.000182709282307374
miR-5589-3p	7.01837417526164	0.000145067179206308
let-7i-3p	4.30046472918977	0.000143571574253406
miR-873-3p	-7.95985257104852	9.88502844610366e-07
miR-200a-5p	-3.63842279669355	8.71647895274837e-05
miR-199b-3p	-4.09815212399436	8.6894103276207e-15
miR-199a-3p	-4.09815212399436	8.68369277486645e-15
miR-369-3p	-7.24631004611793	8.49500527691227e-05
miR-99b-5p	-5.63661001103472	8.42187585741971e-27
miR-34c-5p	-5.68216210247759	8.30831173812807e-23
miR-486-3p	-6.50665120452833	8.25607799554941e-06
miR-532-5p	-2.29518210260597	8.15200300796952e-09
miR-141-5p	-9.32792366953181	7.89008641149157e-14
miR-149-5p	-4.18610161698427	7.75222385005252e-14
miR-106b-5p	-2.20629220224994	7.69894412748101e-07
miR-126-5p	-2.77954035185665	7.61795245389325e-10
miR-181d-5p	-10.048982955459	7.55455567134862e-18
miR-145-5p	-7.77014848810009	7.51140715187388e-07
miR-889-3p	-8.35853567686314	7.50801220827292e-09
miR-424-3p	-8.12748597980031	7.41313776147596e-08
miR-214-3p	-4.654735779386	7.28789933491372e-06
miR-758-3p	-8.4667415867001	7.26829286264408e-09
miR-371b-3p	-6.38579676960403	7.25786524095276e-06
miR-372-3p	-5.79286979176866	7.01331001651504e-26
miR-9-3p	-7.88381657206601	7.01261152973173e-05
miR-501-3p	-4.52464629229394	6.72903078776822e-13
miR-205-5p	-7.22258742614762	6.63784775127853e-48
miR-181b-5p	-2.24807983988519	6.62210328197763e-09
miR-424-5p	-5.67336044793332	6.54130940649408e-10
miR-296-5p	-4.39427069592443	6.42381705567518e-08
miR-542-3p	-4.53493027996577	6.37723834881928e-06
miR-330-5p	-4.15662123035879	6.32456611501311e-10
miR-767-5p	-4.61096627894828	6.26466560056513e-06
miR-302a-5p	-7.6265356036381	6.0121596017557e-44
miR-708-3p	-6.11058570332907	5.83727270650107e-13
miR-421	-3.78427660470328	5.6574802030227e-17
miR-134-5p	-5.22819827746469	5.62378678380846e-08
miR-219b-5p	-7.92991732268474	5.58867725873779e-05
miR-31-5p	-6.71360045509515	5.5361937804674e-35
miR-500b-5p	-7.57119298187112	5.52615953534122e-06
miR-625-3p	-4.34625665492562	5.16690843577896e-08
miR-218-5p	-6.13600314583687	5.08782330956568e-24
miR-23a-3p	-2.75218455048429	5.06698760186206e-08
miR-200a-3p	-2.58793998006798	4.87561380797398e-07
miR-221-5p	-4.84199233011463	4.86291716857568e-10
miR-454-3p	-2.85191033545975	4.83208295043826e-09
miR-493-5p	-3.86124331481592	4.82343550901943e-07
miR-200b-3p	-3.0635566971794	4.76902476042358e-12
miR-187-3p	-8.21697130336847	4.76574426117634e-08
miR-487b-3p	-8.07374368899146	4.72682047326168e-07
miR-409-3p	-7.86694080687063	4.49088317604239e-24
miR-296-3p	-3.25344643803452	4.42712931810781e-07
miR-670-3p	-7.31740345667268	4.4260013749476e-05
miR-1-3p	-8.52797221089863	4.32953111032806e-09
miR-106a-5p	-5.02396008286756	4.31415993540741e-17
miR-92b-3p	-6.96785472253052	4.29789117992665e-30
miR-136-3p	-3.78570757648107	4.21825754996412e-10
miR-1305	-7.29409275766152	4.16877745162323e-05
miR-181c-5p	-5.45941267002389	4.1350884898127e-21
miR-302d-5p	-7.31740345667268	4.09296187182249e-05
miR-196b-5p	-6.50665120452833	3.80652392662344e-13
miR-335-3p	-3.05729560171487	3.79217856049345e-13
miR-373-3p	-6.575015847599	3.79067118919158e-28
miR-181c-3p	-5.61851785349408	3.76101630150438e-14
miR-934	-7.60946748176043	3.73129188846831e-06
miR-449a	-5.43711432417033	3.67180341110702e-05
miR-431-5p	-8.26571927355055	3.59016977305415e-08
miR-323a-3p	-4.62570415154361	3.55043842514099e-05
miR-221-3p	-2.2042103680693	3.52958518768682e-08
miR-367-3p	-6.50665120452833	3.39474971672349e-15
miR-489-3p	-7.34034348855566	3.36477340989726e-05
miR-330-3p	-4.33421234959108	3.32551157024822e-05
miR-873-5p	-8.15362456514864	3.29086633088473e-07
miR-301b-3p	-3.97389740323518	3.27051118946719e-15
miR-10a-3p	-8.00362207148624	3.25119081042631e-07
miR-199a-5p	-8.45627897791136	3.19225156399622e-09
miR-181b-5p	-2.42857745662123	3.126735129382e-10
miR-135a-5p	-7.83619392478095	3.1120053854608e-05
miR-18a-5p	-3.88909500000846	3.04884841190777e-15
miR-141-3p	-5.5872406885542	3.04456007238344e-31
miR-486-3p	-6.38198545851923	3.01655718465547e-05
miR-199a-3p	-3.92145645912641	3.01515258273738e-14
miR-429	-3.57270910296374	2.98879144051782e-11
miR-512-3p	-4.85563622853292	2.92647401002657e-06
miR-204-5p	-2.1911821606999	2.91860923795597e-06
miR-302c-5p	-7.40705296950474	2.89762314901783e-05
miR-135a-5p	-7.89934774665371	2.89145539960068e-05
miR-449c-5p	-4.67322091238765	2.85396431498405e-05
miR-490-3p	-7.29409275766152	2.75553287417824e-05
miR-625-5p	-4.34625665492562	2.75228730931474e-09
miR-660-5p	-2.28591123040413	2.74603280341843e-08
miR-135b-5p	-5.17394963270129	2.73560173162731e-13
miR-182-5p	-6.38046247176274	2.66753420957541e-39
miR-598-3p	-4.19310299815893	2.57929639293902e-08
miR-769-5p	-2.12905022709135	2.52318802537831e-07
miR-9-5p	-6.16448741107566	2.49890089830933e-15
miR-371a-3p	-8.81676803468394	2.44704496878335e-10
miR-96-5p	-8.697462880205	2.42084297794147e-10
miR-222-3p	-3.82368291880357	2.41940366730649e-20
miR-10a-5p	-5.51089538204087	2.31095045914412e-31
miR-486-5p	-6.88296438033179	2.30239344529648e-17
miR-500a-3p	-3.8585644970412	2.29432848058575e-19
miR-20b-5p	-5.62736464363388	2.2799601575623e-23
miR-301a-3p	-4.56120324611694	2.18520999585708e-25
miR-411-5p	-5.54394065176299	2.07122144283479e-20
miR-500a-5p	-7.64675275206608	2.00843100202235e-06
miR-454-5p	-8.50784937581039	1.97686351158766e-09
miR-432-5p	-9.24525596628806	1.96782735935346e-12
miR-127-3p	-5.1826282414278	1.90517030665661e-25
miR-92a-1-5p	-2.85073774228427	1.88442865906198e-05
miR-363-3p	-6.29770266679657	1.88089571986625e-30
miR-17-5p	-2.33053833748892	1.83979091252408e-09
miR-654-3p	-5.01010778001646	1.83779310205289e-16
miR-302c-3p	-7.83389131292097	1.82221408760124e-30
miR-877-5p	-4.17891647601889	1.80859993811178e-08
miR-486-5p	-6.75810004829113	1.7669527981574e-16
miR-133a-3p	-6.7747253118029	1.76163027096368e-16
miR-199b-5p	-4.23003367652675	1.73147249594844e-13
miR-370-3p	-3.9156746790837	1.72435003460961e-05
miR-143-3p	-3.92214386484298	1.71177859481964e-20
miR-93-3p	-2.79546399907899	1.69740347183689e-05
miR-887-3p	-5.76939674264193	1.68956506188215e-10
miR-125a-5p	-5.52073410229594	1.6861530936645e-28
miR-183-5p	-6.33272393241166	1.63309888258103e-34
miR-218-5p	-6.20578635600973	1.6268534188484e-24
miR-371a-5p	-6.67827849490595	1.62323749028754e-25
miR-9-5p	-6.28069754837516	1.60403640597206e-15
miR-133a-3p	-6.77141555061946	1.56744482022769e-16
miR-18a-3p	-3.14734749064265	1.56559139697397e-06
miR-190a-5p	-3.64584439571632	1.55449651400764e-17
miR-218-1-3p	-7.40705296950474	1.55183334348325e-05
miR-155-5p	-6.2924570761974	1.54383767827443e-13
miR-1-3p	-8.42442804214094	1.50962124877113e-08
miR-135b-3p	-8.0599893760912	1.50407181614606e-07
miR-629-5p	-2.2240202655217	1.50211277730887e-05
miR-125a-3p	-7.44987166369365	1.44443238523106e-05
miR-188-5p	-7.95985257104852	1.39905425046465e-07
miR-181a-3p	-3.40340963510944	1.39158842938805e-08
miR-675-5p	-3.96313599423725	1.38710832856036e-09
miR-302d-3p	-7.97144597510434	1.37069832415442e-48
miR-302a-3p	-7.2953331302463	1.3501406664688e-45
miR-10b-5p	-4.52049152096635	1.33328615314511e-08
miR-653-5p	-8.08736810892368	1.31454227966845e-07
miR-410-3p	-4.17954281944935	1.24146354728894e-13
miR-561-5p	-6.43185227081803	1.24127405809925e-19
miR-675-3p	-3.11430961483726	1.23754811529462e-06
miR-200c-3p	-6.84568265528206	1.23086981122734e-17
miR-130a-3p	-2.76459477684784	1.19676083751389e-11
miR-1270	-8.56739493876199	1.13715151904432e-09
miR-18b-5p	-6.01866017050018	1.11548443900483e-10
miR-302b-3p	-6.94253333239457	1.0813446516534e-43
miR-99b-3p	-5.36966352012329	1.06457807550677e-12
miR-708-5p	-6.33343369368333	1.06158225926289e-14
miR-381-3p	-5.5882013949999	1.03906182740139e-19
miR-450b-5p	-8.70631971127016	1.00928316811007e-10
miR-371b-5p	-8.61520512789475	1.00086818928877e-05
miR-504-5p	-6.8263343234193	0.000927202679309141
miR-203b-3p	-6.92067986923727	0.000911138163476581
miR-376c-3p	-6.88991182203467	0.000844518953252265
miR-431-3p	-6.92067986923727	0.000790619782543643
miR-1251-5p	-7.11943405130167	0.000756893753208059
miR-411-3p	-6.72538461865997	0.000741099149786472
miR-450a-5p	-6.57875920284763	0.00073882252152694
miR-129-5p	-6.92067986923727	0.000656152761855523
miR-183-3p	-6.95080541162566	0.00062226493346873
miR-652-3p	-2.45497541377494	0.000506007256216809
miR-501-5p	-3.42464317693344	0.000503836445588673
miR-548f-3p	-7.00923254462526	0.000501339241777619
miR-219a-2-3p	-4.62570415154361	0.000391028034200938
miR-24-2-5p	-4.03627113753736	0.000377503964565241
miR-7974	-3.45966551961284	0.000233053831352863
miR-1247-3p	-2.34876403331639	0.000213817075608789
miR-34b-5p	-7.22181181123657	0.000166147203952501
miR-502-3p	-2.09515617073646	0.00014535915468693
miR-493-3p	-3.69829973901631	0.00012126907824819
d24/Hep	logFC	FDR
miR-125b-5p	2.65835972646548	9.97279789122519e-20
miR-5588-5p	4.04842583300469	9.70903000761543e-05
miR-3609	3.86865462645426	9.37405284895407e-27
miR-27b-3p	2.2855854719737	9.30639306554332e-23
let-7a-3p	6.0973684466644	8.48475880734296e-18
miR-193a-5p	2.40889618312012	8.36995025974655e-16
miR-29c-5p	9.02443754231549	8.29375375223909e-16
miR-5589-3p	7.22399213825296	8.25767408650396e-05
miR-378a-3p	4.85498922554927	7.71777131233241e-80
miR-194-5p	3.68787525382752	7.67381952708771e-41
miR-378d	6.0905542377814	7.63084941503047e-13
miR-378b	5.48833833876716	7.35924588550958e-09
let-7b-5p	10.5076155942714	7.31286045068822e-143
miR-6723-5p	5.7230899597401	7.01917275231438e-45
miR-29b-3p	4.23159152709643	6.94321768925957e-30
miR-618	3.52127015491953	6.90750994253574e-08
miR-885-3p	7.50239607545726	6.83536181748219e-06
miR-192-5p	3.99155740742426	6.64644516222322e-48
miR-3653-3p	2.98275690246004	6.57621906719394e-24
miR-193b-5p	4.23284927122406	6.4863520649965e-13
miR-3607-3p	2.57641782712779	5.93922480189039e-15
miR-3591-3p	6.05111651918351	5.90875758025403e-54
let-7f-5p	7.40752926323982	5.86938339286615e-125
miR-499a-5p	2.35657574171063	5.86798874180643e-05
miR-499b-3p	2.35657574171063	5.83041253914913e-05
miR-194-3p	4.54781812269847	5.77478820734192e-50
miR-215-5p	3.74693072229097	5.75814744677675e-32
miR-6515-3p	8.11261610751545	5.45787591929935e-09
let-7i-5p	6.58413849505452	5.37355159402471e-78
miR-4510	6.68168399462569	5.14756974460831e-30
miR-122-5p	6.05111651918351	5.0231217604418e-54
miR-192-3p	4.09566414006985	4.99874851183914e-21
miR-99a-5p	3.0337165258921	4.84313251118161e-26
let-7f-5p	7.52938023034662	4.63059652997323e-128
miR-497-5p	3.9062821593387	4.47896143661672e-19
miR-378d	8.26961807487122	4.47126276980398e-10
miR-378a-5p	4.64440146776391	4.20188472800166e-20
miR-101-3p	4.03857215148273	3.76193781487703e-63
let-7b-3p	7.68572416349649	3.73752762590175e-32
miR-3607-5p	2.17563670156154	3.72841632714651e-16
miR-146b-5p	3.4592801313528	3.5502780525029e-41
let-7f-2-3p	4.53369839805143	3.45268001410437e-10
miR-29c-3p	4.59671641676516	3.42330070432836e-61
miR-101-3p	3.98599478109776	3.40302907566444e-61
miR-99a-3p	3.86301367697381	3.36803447349032e-29
miR-100-5p	3.61304095881635	3.30599328788596e-33
miR-194-5p	3.80200807355398	3.2340520195767e-42
miR-5589-5p	7.32288432179366	2.97659779448661e-05
miR-122-3p	4.82947830818742	2.95762763900234e-36
miR-195-3p	5.42967046799451	2.84636174388888e-08
miR-152-3p	2.59254972802241	2.78133370842313e-23
miR-148a-3p	3.02301316354275	2.6302919637581e-34
miR-3591-5p	4.83357084390989	2.59239054260288e-36
miR-1248	8.08696178844979	2.57697089538964e-136
let-7a-3p	6.07663800829847	2.3708301771777e-17
miR-33b-5p	4.66816610746131	2.33371584550317e-33
let-7d-3p	5.28499974210044	2.33044231285122e-20
miR-125b-2-3p	2.58755729741442	2.26173266983882e-15
miR-98-5p	6.97208239436161	2.20065683413473e-64
let-7c-5p	6.34793097136542	2.18613605775584e-72
miR-107	2.06660681313113	2.18249617343679e-16
miR-29b-3p	4.23555630426252	2.16750951076959e-29
let-7a-5p	6.5902611288235	2.15977901746392e-118
miR-29a-3p	4.00948075277887	2.07668219348469e-50
miR-125b-5p	2.65930599217631	2.00163055613285e-19
let-7d-5p	6.72270203353645	1.93797770036738e-76
miR-23b-3p	2.49529191224868	1.87752422176972e-26
miR-22-3p	2.48279156035225	1.71429499610071e-27
miR-4662b	2.86786532642887	1.64667397405768e-09
miR-4662a-5p	2.86786532642887	1.64122354197377e-09
miR-4751	8.36553175275897	1.57641215210102e-10
miR-3653-5p	2.99489771949291	1.47320655587737e-08
let-7g-5p	7.68818999397123	1.38450942346938e-108
let-7a-5p	6.63908990742075	1.29022092992185e-118
miR-885-5p	6.71747908241226	1.1898236678759e-40
miR-378c	6.4392751774691	1.18635685321201e-81
miR-26b-5p	2.31349319241152	1.13830046105035e-25
miR-4686	7.66202296614627	1.13653514147307e-06
miR-195-5p	5.2112680320444	1.10368392414959e-38
miR-146b-3p	3.92305175173593	1.01482695278098e-28
let-7i-3p	3.38189938951575	0.000613569955255307
let-7g-3p	4.31079558985417	0.000305364940088648
miR-98-3p	5.21046254931963	0.000291365466633079
miR-612	7.11781906633554	0.000160272617025883
miR-378f	5.62268579884757	0.000147984975278755
miR-548ah-5p	2.74394895319578	0.000146797023197684
miR-101-5p	2.51202075920567	0.00010403629836694
miR-486-3p	-7.03223624953057	9.98291275837988e-28
miR-92a-1-5p	-2.57617190228105	9.83234701483286e-06
miR-10a-5p	-6.87608078678948	9.74677113616089e-95
miR-330-5p	-4.90363821987721	9.66264455293027e-22
miR-129-5p	-7.31054900628987	9.24867788629347e-05
miR-218-1-3p	-8.87436504940097	9.17568488037926e-13
miR-449b-5p	-9.49818521811548	9.1497595926726e-18
miR-181c-5p	-6.27225535821865	9.1176551419249e-54
miR-1247-3p	-2.89605680984287	9.09381300418978e-11
miR-141-3p	-5.88660845349612	9.0809222240913e-42
miR-561-5p	-6.51173182957874	8.99362842868964e-32
miR-199a-5p	-11.580352680771	8.71098527502294e-46
miR-3120-3p	-9.83439459549233	8.12424315140451e-22
miR-214-5p	-9.83439459549233	8.12053222970772e-22
miR-146a-5p	-3.45565032715962	8.02137278698076e-13
miR-450a-5p	-8.18902702209273	7.97103720021285e-09
miR-1180-3p	-2.78088907682182	7.86417637201271e-08
miR-9-3p	-8.15200297795933	7.7669449496838e-09
miR-660-5p	-2.74187915773821	7.67972104670758e-28
miR-204-5p	-3.69281011915033	7.64924979859524e-27
miR-221-3p	-2.67918741333242	7.56477069436447e-31
miR-372-3p	-5.12164127851919	7.5607776848816e-38
miR-490-3p	-9.7252022889235	7.5532474711343e-20
miR-889-3p	-10.9058105227639	7.54226237711189e-28
miR-200a-5p	-3.87684700945461	7.3403416156039e-06
miR-196a-5p	-5.43271626554881	7.3063639578418e-08
miR-370-3p	-5.36487757207152	7.23470906041659e-13
miR-376c-3p	-9.3480416105964	7.14055275887452e-12
miR-302b-3p	-5.77538077493871	7.13920425751956e-48
miR-18b-5p	-6.16284043799853	7.13317195313754e-19
miR-106b-5p	-2.49923606001744	7.07549210854615e-20
miR-381-3p	-7.21289161080872	6.96037019747908e-48
miR-1197	-4.8562601701883	6.84231328411681e-07
miR-767-5p	-5.56802213801822	6.76756357506636e-14
miR-485-5p	-7.33277699339611	6.76063031861914e-05
miR-125a-5p	-6.57076805658502	6.70661808358229e-79
miR-625-5	-4.01773925847131	6.64308942901759e-12
miR-31-5p	-6.57804843872788	6.61270520133264e-55
miR-433-3p	-7.28797318042749	6.5797969447984e-05
miR-219b-5p	-7.92210233538037	6.44820403750369e-07
miR-377-5p	-7.33277699339611	6.42233140213168e-05
miR-367-3p	-4.86679808942722	6.40623347368384e-08
miR-429	-4.5393343958194	6.36132886936251e-22
miR-1-3p	-9.49325975463848	6.339710304451e-18
miR-615-3p	-4.8772595940571	6.32678017750351e-09
miR-1270	-9.1557127516656	6.31329256269607e-15
miR-376a-3p	-7.43905282046065	6.27799791792376e-05
miR-208b-3p	-7.39747714584615	6.27799791792376e-05
miR-145-3p	-7.71769286235865	6.23598233582162e-07
miR-127-5p	-8.33931631763369	6.09891355147713e-08
miR-675-3p	-4.50949023927377	6.03030146967543e-23
miR-145-5p	-9.7252022889235	6.00210759940831e-20
miR-487a-3p	-4.90819650551049	5.99483899303628e-08
miR-106a-5p	-5.15955219997157	5.9873696046558e-32
miR-380-3p	-7.81564461123544	5.90961522002152e-06
miR-487b-3p	-10.3081948992784	5.90172060719169e-22
miR-424-5p	-6.24187649661579	5.69393434446183e-19
miR-500a-5p	-8.03486395671907	5.67404444572828e-07
miR-301b-3p	-4.81508752902421	5.64491580038146e-44
miR-369-5p	-8.53414767097085	5.61311944967312e-10
miR-299-3p	-8.54370794667775	5.61311944967312e-10
miR-302a-3p	-5.63050380451772	5.60587889636852e-46
miR-196b-5p	-8.01172207777653	5.51167576428116e-35
miR-143-3p	-6.10252296245896	5.39117627412576e-85
miR-99b-3p	-6.39485137653942	5.37929913076473e-30
miR-411-3p	-7.64849033781051	5.27307163953195e-05
miR-135b-5p	-5.12100724580299	5.24414710032054e-17
miR-302d-3p	-6.53334937863858	5.24390227780846e-58
miR-450a-5p	-8.21319217484523	5.18180208546788e-09
miR-133a-3p	-7.28885683153253	5.14756974460831e-30
miR-708-5p	-7.00863936208575	5.13603815909431e-29
miR-125a-3p	-8.31718963048604	5.10233427634856e-10
miR-363-3p	-6.57196327650324	5.08470429896693e-77
miR-302c-3p	-6.58525818693958	5.00455565564117e-29
miR-24-2-5p	-4.98759140674664	4.99425391498315e-08
miR-585-3p	-8.02124140908542	4.96549644454233e-07
miR-675-5p	-4.82962767735713	4.91609614287053e-23
miR-335-5p	-2.54416014135012	4.87823447600348e-19
miR-222-3p	-4.13348753491682	4.7793081701631e-56
miR-584-5p	-7.89247890708261	4.77068823941201e-07
miR-196a-5p	-8.10111155566791	4.77068823941201e-07
miR-1-3p	-9.57944336336084	4.65879245128683e-19
miR-181c-3p	-6.36603132018087	4.53550107488905e-31
miR-135a-5p	-8.67129735981501	4.46240471587517e-12
miR-181b-5p	-3.46460903367606	4.44846296465483e-40
miR-93-3p	-2.94068579612694	4.20874350706516e-08
miR-23a-3p	-3.31519160606737	3.9784129138113e-19
miR-18a-5p	-3.83213614799425	3.96491396614669e-29
miR-323b-3p	-8.00748900435205	3.93120370671768e-07
miR-126-3p	-3.21714148247776	3.88058851177928e-17
miR-450b-5p	-10.4343319766486	3.87307063652826e-28
miR-625-3p	-4.03781844565779	3.67608568317584e-12
miR-92b-3p	-6.70053217054758	3.66984401934907e-42
miR-214-3p	-6.76564258215301	3.61940266875218e-24
miR-652-3p	-3.10978902514903	3.61759793736968e-09
miR-155-5p	-6.56993970398394	3.41259720330598e-22
miR-127-3p	-7.01755015587075	3.41258921110293e-64
miR-493-3p	-5.44789947116216	3.39092082213422e-15
miR-454-5p	-8.8969186928964	3.37931149264057e-13
miR-369-3p	-9.70404217330555	3.3279950901063e-16
miR-129-5p	-7.2650384560715	3.28813646265497e-05
miR-199a-3p	-7.05006294496133	3.28000130362517e-74
miR-135b-3p	-7.90736665359309	3.26493762007569e-07
miR-96-5p	-8.45529533440313	3.24087147932464e-09
miR-135a-5p	-8.68863705678602	3.20226598392527e-12
miR-493-5p	-5.94858168808557	3.16169918569147e-22
miR-421	-4.19586630108261	3.15526215887471e-37
miR-501-3p	-5.08696082065026	3.06279171156141e-27
miR-199b-3p	-7.049226042746	3.05334945914301e-74
miR-18a-3p	-2.50582951660325	2.96267197939416e-05
miR-330-3p	-4.75778607963269	2.87435372815377e-08
miR-190a-5p	-4.54355558345866	2.86918679245303e-40
miR-629-5p	-2.44251672940062	2.81972131328379e-11
miR-1251-5p	-7.87743592463435	2.81769378504379e-08
miR-10b-5p	-6.88587346705732	2.78405775192633e-17
miR-410-3p	-6.29177521121546	2.77685676331044e-45
miR-371b-5p	-7.86223443478697	2.75963254792596e-07
miR-371a-3p	-7.86223443478697	2.75559375427741e-07
miR-296-3p	-3.33363200233265	2.72836600951884e-10
miR-181a-5p	-2.34966308744996	2.70113551745998e-25
miR-20b-5p	-5.86269413085077	2.69909462988038e-50
miR-181a-5p	-2.34316721824855	2.68361865633988e-25
miR-219a-2-3p	-4.37043444080209	2.63664453644413e-05
miR-1305	-7.49925266133621	2.54490475921231e-05
miR-543	-7.71769286235865	2.54490475921231e-05
miR-539-3p	-5.45383896709299	2.54196697470034e-09
miR-502-3p	-2.73276353585669	2.52980133519135e-10
miR-218-5p	-7.37230972645735	2.51087792888149e-66
miR-656-3p	-7.61260310558529	2.38236252322669e-05
miR-182-5p	-6.17284664429117	2.34110318050919e-63
miR-432-5p	-11.2807224717633	2.32575553883673e-34
miR-3120-5p	-6.77406454987542	2.27640859700435e-24
miR-141-5p	-9.18655316804675	2.25282437518743e-13
miR-199a-3p	-6.8531336315925	2.24765414398265e-73
miR-17-5p	-2.31147590207972	2.23522740473706e-21
miR-9-5p	-6.39239373753853	2.23407951006486e-39
miR-188-5p	-7.8468710615621	2.19974870713404e-06
miR-431-3p	-8.68863705678602	2.15249354278241e-10
miR-708-3p	-6.81545233506603	2.13423547416934e-27
miR-133a-3p	-7.28493329413155	2.11029952016677e-30
miR-411-5p	-7.16752646812403	2.10965452259897e-50
miR-486-3p	-6.88966972057136	2.10544708105039e-25
miR-486-5p	-6.88966972057136	2.10544708105039e-25
miR-758-3p	-10.1974789501544	2.04122228457827e-15
miR-873-3p	-8.53414767097084	2.01908051516993e-10
miR-887-3p	-7.18741757444292	2.00523717503081e-29
miR-296-5p	-4.86368071165201	2.00389815977849e-14
miR-1185-1-3p	-8.24869751006979	1.99350738782776e-07
miR-582-5p	-2.32866397273719	1.92405861794975e-06
miR-500a-3p	-4.30427803141774	1.92120051737786e-48
miR-769-5p	-2.40539453733137	1.92051215480256e-21
miR-10a-3p	-9.24045710058982	1.91743779526249e-16
miR-542-3p	-5.89587178837767	1.89576471737818e-15
miR-134-5p	-7.10302611180592	1.87799843566159e-23
miR-200a-3p	-3.24215346700684	1.85575935433602e-13
miR-382-3p	-8.00748900435205	1.8543423354961e-06
miR-181a-3p	-4.99963410202772	1.83610630980668e-32
miR-221-5p	-5.19612020231745	1.80608493750009e-17
miR-877-5p	-4.20390027902119	1.79892590791239e-11
miR-335-3p	-3.63554311911492	1.79142215406484e-34
miR-431-5p	-10.907662730542	1.79070622725183e-26
miR-130a-3p	-3.06258151128473	1.7810592757632e-32
miR-582-3p	-2.06853482975662	1.75062971730159e-08
miR-653-5p	-7.87743592463435	1.74326889675146e-07
miR-301a-3p	-5.18804495596513	1.69525243184499e-64
miR-199b-5p	-6.95311075936771	1.68650718865441e-68
miR-412-5p	-8.07497641607389	1.61797297698487e-07
miR-183-5p	-6.41238510599634	1.60504495258215e-43
miR-149-5p	-4.58471297468138	1.49245377386136e-29
miR-200b-3p	-3.69533621770922	1.49233868115581e-19
miR-99b-5p	-6.86759125674768	1.48819710809628e-77
miR-34c-5p	-6.16461768988761	1.4830092330335e-48
miR-454-3p	-3.37640621736095	1.45452065940954e-26
miR-136-5p	-8.67129735981501	1.45260977524495e-08
miR-15b-3p	-2.09802548756458	1.44115843135572e-05
miR-873-5p	-9.37506870496078	1.43488211325349e-16
miR-200c-3p	-6.99188885144298	1.42558169651279e-23
miR-205-5p	-7.05748783964017	1.41879401329719e-85
miR-409-3p	-9.59952606603976	1.41680979158376e-49
miR-181a-2-3p	-2.25147566851088	1.41649100987274e-16
miR-9-5p	-6.50907523458643	1.41587355446415e-39
miR-371a-5p	-5.45323092284132	1.40540719443151e-25
miR-371b-3p	-5.45323092284132	1.40540719443151e-25
miR-598-3p	-4.89934403338324	1.38603477359082e-18
miR-449a	-7.85966156754497	1.37678103619781e-38
miR-9-3p	-8.12678165610922	1.3646813000847e-08
miR-424-3p	-9.80686934585902	1.34723269420366e-21
miR-181b-5p	-3.24140859778423	1.31079182919425e-35
miR-181d-5p	-10.8510352007972	1.31079182919425e-35
miR-302a-5p	-6.12757474828585	1.30150736574236e-50
miR-136-3p	-5.74413658393687	1.29381196585e-32
miR-670-3p	-8.07497641607389	1.25448042291633e-08
miR-500b-5p	-7.97958455241375	1.24903470696932e-06
miR-187-3p	-7.55704081962386	1.23954678456161e-05
miR-34b-5p	-8.00748900435205	1.23596789032562e-07
miR-532-5p	-2.67251956942585	1.23481331878086e-27
miR-373-3p	-5.76822216160672	1.192132032547e-41
miR-1247-5p	-2.3496141449932	1.18594290042345e-15
miR-184	-3.86876912428149	1.16327375041309e-11
miR-323a-3p	-6.28179803089636	1.14360939792109e-14
miR-501-5p	-3.80994331099265	1.11471735345612e-05
miR-449c-5p	-6.97065029512088	1.08242004579736e-30
miR-218-5p	-7.42227270001866	1.06441766058042e-67
miR-654-5p	-8.35025368953007	1.04604999976507e-08
miR-126-5p	-4.25354914704569	1.03772918164017e-35
miR-934	-8.33931631763369	1.03619216636052e-08
miR-654-3p	-7.08163497447855	1.01458484244146e-47
miR-486-5p	-7.03223624953057	1.00081019850852e-27
miR-377-3p	-7.2180453576769	0.000850940988587012
miR-379-5p	-3.88148253147448	0.000848768938900909
miR-495-3p	-7.09339512112088	0.000825983011693137
miR-124-3p	-6.67319030727402	0.00065751322580348
miR-489-3	-6.9852891016461	0.000639996084341658
miR-138-5p	-6.83766285599696	0.000621549775020829
miR-4326	-3.70480102468432	0.000480709869806221
miR-935	-6.9852891016461	0.000452630537529911
miR-27a-5p	-2.5669257920695	0.000415936736404898
miR-138-5p	-6.86842135597666	0.000396286452475495
miR-326	-3.96232044854521	0.000229903867481949
miR-532-3p	-2.04609388456535	0.000200673659349874
miR-504-5p	-7.14455468916177	0.000141266222403911
miR-342-5p	-2.30053746679432	0.000106848888093245

## Sheet: Arkusz2
gene	logFC(Hep/d20)	FDR	logFC(Hep/d24)	FDR	logFC(d24/d20)	FDR
snoID_0310	-6.55	1.37e-08	-5.66	0.000578	-	-
snoID_0318	-5.93	1.12e-05	-	-	-2.74	0.0137
snoID_0319	-2.13	2.85e-05	-1.25	0.0323	-	-
snoID_0324	-4.6	2.49e-07	-4.53	9.5e-07	-	-
snoID_0350	-4.15	3.93e-07	-3.44	1.01e-05	-	-
snoID_0369	-2.91	2.65e-09	-1.52	0.00449	-1.35	0.00478
snoID_0370	3.75	5.97e-08	4.31	3.22e-10	-	-
snoID_0371	-3.24	9.19e-05	-	-	-2.31	0.00537
snoID_0372	-5.64	6.61e-05	-4.79	0.0167	-	-
snoID_0375	-5.76	2.23e-05	-4.98	0.00543	-	-
snoID_0378	-2.19	3.85e-13	-1.29	4.69e-05	-0.845	0.0482
snoID_0379	-5.31	0.000404	-	-	-	-
snoID_0381	-3.73	5.23e-27	-1.46	0.000352	-2.22	1.7e-09
snoID_0386	-1.27	4.69e-05	-	-	-1.31	0.00156
snoID_0388	-3.61	7.94e-15	-1.49	0.0336	-2.07	1.45e-07
snoID_0392	-2.52	0.000113	-	-	-	-
snoID_0400	-3.61	1.11e-12	-2.81	1.43e-06	-	-
snoID_0409	-2.67	3.05e-17	-	-	-1.93	2.61e-08
snoID_0435	-5.46	0.000435	-5.08	0.00285	-	-
snoID_0662	-2.25	2.27e-12	-1.17	0.000669	-1.03	0.00189
snoID_0668	-2.41	9.42e-13	-1.44	0.000133	-0.918	0.0128
snoID_0681	-4.65	5.12e-70	-2.45	4.56e-14	-2.14	4.3e-11
snoID_0684	-3.49	7.23e-18	-2.82	7.04e-11	-	-
snoID_0688	-5.76	2.02e-05	-5.61	0.00113	-	-
snoID_0709	-3.84	0.000114	-	-	-2.03	0.0324
snoID_0714	-3.11	3.55e-14	-	-	-2.22	4.76e-09
snoID_0720	-4.21	2.85e-08	-4.47	1.08e-14	-	-
snoID_0723	-4.74	3.09e-08	-3.6	0.001	-	-
snoID_0725	-2.57	0.000661	-	-	-1.99	0.0168
snoID_0729	-1.66	0.00055	-	-	-	-
snoID_0730	-3.19	8.11e-08	-1.72	0.0293	-1.45	0.00559
snoID_0731	-5.32	0.000399	-6.18	1.29e-05	-	-
snoID_0749	-2.35	4.58e-05	-3.13	5.62e-08	-	-
snoID_0757	-1.32	6.6e-05	-1.49	9.26e-06	-	-
snoID_0760	-3.41	0.00349	-3.96	0.000112	-	-
snoID_0766	-2.68	1.6e-08	-3.55	1.3e-12	-	-
snoID_0792	-5.39	0.000404	-5.52	0.00175	-	-
snoID_0796	-2.55	1.64e-10	-2.46	3.16e-10	-	-
snoID_0826	-6.05	2.56e-06	-6.6	6.16e-07	-	-
snoID_1103	-1.52	6.88e-12	-1.37	2.38e-09	-	-
snoID_1104	-1.78	1.28e-14	-1.7	7.89e-16	-	-
snoID_1105	-2.03	1.52e-17	-2.03	4.25e-22	-	-
snoID_1106	-1.74	6.81e-14	-1.68	1.39e-15	-	-
snoID_1108	1.8	4.8e-11	1.42	4.67e-08	-	-
snoID_1113	-1.39	2.73e-11	-1.4	1.05e-10	-	-
RNU3P3	-4.75	3.49e-12	-5.4	4.74e-20	-	-
SCARNA1	-	-	1.23	0.000141	-	-
SCARNA10	1.93	9.7e-17	1.59	8.55e-13	-	-
SCARNA12	2.09	4.8e-16	2.1	5.78e-16	-	-
SCARNA14	-2.32	0.00183	-2.38	0.000744	-	-
SCARNA15	-1.37	4.36e-07	-1.86	1.49e-15	-	-
SCARNA16	1.25	0.000525	-	-	-	-
SCARNA17	4.79	1.1e-90	4.83	9.33e-100	-	-
SCARNA18	-2.08	4.53e-11	-2.04	2.05e-11	-	-
SCARNA2	1.12	3.78e-06	0.626	0.0387	-	-
SCARNA21	-2.76	7.39e-05	-3.12	6.56e-07	-	-
SCARNA22	-1.11	0.0176	-1.8	0.000127	-	-
SCARNA26A	2.53	8.32e-05	2.28	0.000281	-	-
SCARNA28	1.21	3.95e-06	1.16	5.78e-07	-	-
SCARNA4	1.52	1.1e-09	0.933	0.000656	-	-
SCARNA5	1.89	2.14e-18	2.34	8.23e-26	-	-
SCARNA6	1.18	3.61e-06	1.74	3.56e-11	-	-
SCARNA7	1.84	1.34e-15	1.41	1.25e-09	-	-
SCARNA9	1	8.11e-05	0.885	7.56e-05	-	-
SCARNA9L	0.955	0.000549	1.24	1.85e-07	-	-
SNORA101B	0.62	0.046	-	-	1.04	0.000262
SNORA11	-1.34	5.14e-06	-1.78	1.75e-10	-	-
SNORA11D	-4.88	1.37e-09	-5.74	1.61e-16	-	-
SNORA11E	-4.85	2.31e-09	-5.7	3.92e-16	-	-
SNORA11G	-3.49	0.00758	-4.13	7.06e-06	-	-
SNORA12	-0.851	0.0242	-1.28	8.71e-05	-	-
SNORA14A	4.89	3.71e-22	3.74	1.37e-19	-	-
SNORA20	1.79	1.87e-08	1.28	0.000358	-	-
SNORA23	-	-	-1.36	2.01e-06	-	-
SNORA24	1.88	4.2e-11	1.78	4.09e-10	-	-
SNORA24B	1.83	1.23e-08	1.84	1.92e-09	-	-
SNORA25	1.85	4.2e-08	1.41	6.56e-06	-	-
SNORA26	-1.27	2.34e-05	-1.12	7.77e-05	-	-
SNORA28	3.54	6.87e-30	3	1.63e-29	-	-
SNORA31	2.18	8.96e-17	1.65	3.43e-12	-	-
SNORA35B	-5.47	0.000226	-6.87	3.48e-09	-	-
SNORA36B	2.38	2.24e-13	1.92	9.84e-09	-	-
SNORA37	1.72	1.34e-06	0.718	0.0364	1.06	0.0268
SNORA38	0.8	0.0483	-	-	1.53	0.000104
SNORA38B	-	-	-1.22	0.0167	1.86	0.000308
SNORA4	-1.08	0.0321	-1.6	0.000176	-	-
SNORA42	3.59	1.35e-38	3.17	5.55e-35	-	-
SNORA46	5.89	4e-83	4.64	1.59e-64	1.32	0.00148
SNORA47	2.76	1.47e-07	1.83	8.55e-06	-	-
SNORA50	1.38	3.17e-06	-	-	0.916	0.0112
SNORA53	1.86	3.59e-14	1.81	4.46e-14	-	-
SNORA54	1.69	2.63e-05	1.24	0.000281	-	-
SNORA57	1.51	3.91e-12	1.22	2.58e-08	-	-
SNORA58	2.57	6.56e-17	1.96	5.28e-12	-	-
SNORA5A	2.72	1.53e-08	2.43	7.9e-09	-	-
SNORA5C	1.61	6.23e-08	1.21	2.4e-05	-	-
SNORA60	5.62	2.31e-81	4.53	3.04e-73	1.15	0.0134
SNORA61	-	-	-1.24	5.95e-05	0.895	0.0181
SNORA62	3.09	1.1e-25	2.16	4.19e-17	0.988	0.0187
SNORA63D	-	-	-1.33	0.000635	-	-
SNORA64	-1.27	3.27e-09	-1.47	3.81e-12	-	-
SNORA65	-1.58	1.27e-10	-1.12	2.86e-05	-	-
SNORA67	-1.65	6.94e-07	-2.08	6.09e-11	-	-
SNORA69	3.9	9.72e-40	2.63	6.01e-24	1.32	0.00184
SNORA71B	2.42	7.92e-17	2.12	9.5e-16	-	-
SNORA73A	-0.953	4.87e-05	-0.746	0.0012	-	-
SNORA74A	-2.25	2.83e-13	-1.75	3.4e-08	-	-
SNORA76	1.76	1.38e-08	1.57	7.38e-08	-	-
SNORA7A	0.849	0.000366	0.712	0.00593	-	-
SNORA80D	-2.44	7.37e-06	-1.73	0.00558	-	-
SNORA81	5.26	5.19e-62	4.46	3.23e-72	-	-
SNORA84	-1.04	0.000121	-	-	-	-
SNORA86	4.15	1.23e-05	6.29	3.72e-06	-	-
SNORA96(revised)	-1.54	5.95e-13	-1.11	5.05e-07	-	-
SNORD10	-0.95	2.38e-06	-0.622	0.00696	-	-
SNORD100	3.48	1.69e-51	3.85	1.16e-69	-	-
SNORD102	0.823	0.00053	0.889	2.49e-05	-	-
SNORD103A	1.55	5.12e-15	1.56	1.12e-15	-	-
SNORD103B	1.55	5.05e-15	1.56	1.22e-15	-	-
SNORD104	1.31	1.62e-10	1.58	1.34e-14	-	-
SNORD105	0.831	0.00053	1.09	1.74e-06	-	-
SNORD107	-0.88	0.000131	-0.793	0.000544	-	-
SNORD109A	-2.35	1.01e-30	-1.76	1.7e-16	-0.533	0.0361
SNORD109B	-2.35	8.4e-31	-1.76	1.74e-16	-0.533	0.0361
SNORD111B	1.24	9.34e-07	1.54	3.27e-08	-	-
SNORD112	-5.19	2.74e-18	-6.46	1.98e-37	1.29	0.00478
SNORD113-3	-5.44	2.32e-11	-6.52	1.59e-18	-	-
SNORD113-4	-7.13	5.54e-09	-8.13	3.74e-14	-	-
SNORD113-5	-6.49	1.2e-86	-7.79	6.31e-107	1.35	2.61e-08
SNORD113-6	-7.11	1.63e-75	-8.3	3.12e-103	1.22	6.36e-05
SNORD113-7	-6.27	1.87e-80	-7.51	3.58e-120	1.28	1.74e-07
SNORD113-8	-5.42	1.45e-93	-6.66	6.48e-102	1.29	2.61e-08
SNORD113-9	-6.28	3.7e-48	-7.46	2.31e-77	1.22	6.36e-05
SNORD114-1	-6.38	1.55e-104	-7.63	1.06e-143	1.29	1.74e-07
SNORD114-10	-6.01	2.25e-06	-7.68	5.26e-13	1.35	0.0215
SNORD114-11	-8.17	3.77e-44	-8.84	1.75e-55	-	-
SNORD114-12	-4.97	7.99e-71	-6.35	1.13e-85	1.43	5.51e-10
SNORD114-13	-5.69	1.34e-14	-6.8	4.62e-25	1.08	0.00863
SNORD114-14	-6.3	1.05e-103	-7.26	2.18e-127	1.01	2.88e-05
SNORD114-15	-7.08	5.09e-53	-7.97	2.78e-81	0.918	0.00305
SNORD114-17	-6.06	2.76e-25	-7.15	1.01e-42	1.1	0.000915
SNORD114-20	-6.81	1.36e-101	-7.94	1.27e-135	1.17	1.69e-06
SNORD114-21	-7.25	3.96e-86	-8.3	2.3e-128	1.09	1.82e-05
SNORD114-22	-6.85	1.38e-101	-7.92	9.44e-140	1.1	1.14e-05
SNORD114-23	-6.88	1.64e-78	-7.83	8.15e-110	1	0.00162
SNORD114-24	-4.28	3.02e-07	-4.59	5.21e-11	-	-
SNORD114-25	-6.07	3.15e-83	-7.11	3.53e-100	1.1	1.18e-05
SNORD114-26	-6.62	1.33e-107	-7.52	2.66e-134	0.938	0.000283
SNORD114-28	-5.89	2.43e-51	-7	1.13e-79	1.15	2.86e-06
SNORD114-3	-6.3	1.38e-101	-7.38	1.33e-126	1.13	7.16e-06
SNORD114-9	-6.89	8.77e-74	-7.99	4.97e-120	1.12	1.14e-05
SNORD115-1	1.47	9.93e-05	1.95	2.55e-08	-	-
SNORD115-10	1.5	1.13e-07	1.47	3.66e-10	-	-
SNORD115-12	1.19	5.27e-05	1.14	6.29e-06	-	-
SNORD115-13	1.88	3.94e-06	1.77	6.03e-06	-	-
SNORD115-14	2.59	9.19e-18	2.42	3.66e-23	-	-
SNORD115-15	1.57	1.07e-08	1.6	8.95e-10	-	-
SNORD115-17	1.24	2.74e-05	1.18	3.1e-06	-	-
SNORD115-18	1.24	2.74e-05	1.18	3.06e-06	-	-
SNORD115-19	1.24	2.74e-05	1.18	3e-06	-	-
SNORD115-2	1.07	0.00275	1.55	8.02e-07	-	-
SNORD115-20	1.19	5.9e-05	1.13	7.06e-06	-	-
SNORD115-21	2.11	1.47e-11	2.23	1.35e-15	-	-
SNORD115-24	2.33	0.00124	2.93	1.75e-05	-	-
SNORD115-25	1.96	4.61e-05	1.66	3.79e-05	-	-
SNORD115-26	1.38	0.000102	1.27	4e-06	-	-
SNORD115-31	1.7	0.000513	-	-	-	-
SNORD115-32	1.57	3.51e-07	1.61	1.5e-07	-	-
SNORD115-33	1.08	0.00024	0.925	0.00014	-	-
SNORD115-39	1.28	2.32e-05	1.23	9.04e-06	-	-
SNORD115-4	2.13	2.81e-11	2.3	1.17e-12	-	-
SNORD115-42	1.47	1.39e-07	1.3	1.16e-07	-	-
SNORD115-5	3.26	1e-20	3.01	8.46e-16	-	-
SNORD115-6	1.92	1.13e-08	1.88	2.48e-10	-	-
SNORD115-7	5.92	1.04e-05	4.68	1.74e-06	-	-
SNORD115-8	2.06	2.83e-13	2.17	7.95e-16	-	-
SNORD115-9	1.2	5.12e-05	1.14	6.17e-06	-	-
SNORD116-1	-0.987	1.12e-05	-0.781	0.00142	-	-
SNORD116-11	-2.55	4.11e-16	-2.15	2.56e-11	-	-
SNORD116-12	-2.82	3.18e-22	-2.56	2.51e-20	-	-
SNORD116-13	-3.28	1.75e-43	-2.91	1.28e-38	-	-
SNORD116-14	-1.7	9.42e-13	-1.64	9.22e-15	-	-
SNORD116-15	-1.66	1.06e-12	-1.61	2.38e-14	-	-
SNORD116-16	-1.47	7.4e-12	-1.42	5.94e-13	-	-
SNORD116-17	-1.66	2.3e-12	-1.6	2.8e-14	-	-
SNORD116-18	-2.43	7.4e-21	-2.47	1.81e-26	-	-
SNORD116-19	-1.66	1.43e-12	-1.6	2.75e-14	-	-
SNORD116-2	-0.801	0.000455	-0.661	0.01	-	-
SNORD116-20	-1.68	1.72e-12	-1.62	1.81e-14	-	-
SNORD116-21	-1.85	4.21e-14	-1.8	3.85e-17	-	-
SNORD116-22	-1.57	4.84e-12	-1.55	4.51e-14	-	-
SNORD116-23	-1.71	4.81e-13	-1.45	6.1e-12	-	-
SNORD116-24	-1.34	1.37e-10	-1.16	3.34e-07	-	-
SNORD116-25	-1.59	1.38e-11	-1.29	7.17e-11	-	-
SNORD116-26	-1.22	6.98e-07	-1.09	4.8e-07	-	-
SNORD116-29	-1.19	4.98e-07	-0.767	0.00419	-	-
SNORD116-3	-1.92	3.18e-17	-1.76	1.09e-14	-	-
SNORD116-5	-1.93	3.64e-17	-1.77	8.39e-15	-	-
SNORD116-7	-1.93	2.75e-17	-1.78	7.09e-15	-	-
SNORD116-8	-1.21	8.38e-07	-1.15	6.95e-06	-	-
SNORD116-9	-1.92	3.37e-17	-1.76	9.48e-15	-	-
SNORD117	1.18	7.37e-06	1.24	1.29e-07	-	-
SNORD118	4.09	2.01e-83	4.22	4.74e-73	-	-
SNORD12	-1.2	3.02e-07	-0.865	6.56e-05	-	-
SNORD123	-1.87	7.07e-13	-2.85	2.83e-33	1.04	0.000164
SNORD125	1.9	3.5e-21	1.94	4.41e-22	-	-
SNORD126	1.18	2.01e-06	1.74	4.46e-14	-	-
SNORD127	1.37	2.27e-10	1.2	7.38e-08	-	-
SNORD12B	-1.63	2.73e-15	-1.54	1.74e-16	-	-
SNORD12C	-1.73	2.9e-12	-1.66	3.44e-15	-	-
SNORD13	-0.756	0.000368	-0.566	0.0151	-	-
SNORD133	3.37	6.12e-54	3.35	1.04e-54	-	-
SNORD134	5.19	3.26e-32	4.96	1.22e-32	-	-
SNORD136	-2.29	2.08e-24	-1.56	2.95e-09	-0.663	0.0168
SNORD138	0.821	0.000194	0.965	7.37e-05	-	-
SNORD141-1	7.08	1.86e-31	5.1	5.31e-31	-	-
SNORD141-2	7.46	5.58e-15	5	8.38e-17	-	-
SNORD143	-1.54	5.97e-13	-1.11	5.05e-07	-	-
SNORD145	1.92	7.46e-16	2.89	3.71e-26	-0.924	0.0187
SNORD146	-3.03	5.32e-11	-2.92	6.67e-14	-	-
SNORD148	2.08	4.67e-16	3.91	1.35e-40	-1.79	5.52e-07
SNORD149	-1.41	5.39e-06	-	-	-0.939	0.0152
SNORD14A	0.8	0.000328	0.943	1.83e-05	-	-
SNORD14D	1.03	7.94e-07	1.5	2.01e-11	-	-
SNORD150	-4.15	1.51e-18	-2.89	1.98e-08	-1.22	0.0112
SNORD16	2.31	2.92e-23	1.85	7.04e-19	-	-
SNORD160	-8.76	8.25e-79	-7.03	8.28e-37	-1.71	7.64e-09
SNORD169	-	-	2.32	9.71e-08	-1.93	0.0145
SNORD17	-	-	0.707	0.000893	-	-
SNORD170	-2.84	9.58e-08	-	-	-2.13	6.99e-06
SNORD173	-6.24	3.02e-07	-4.69	0.0181	-1.88	0.0174
SNORD175	-3.15	0.000844	-2.49	0.0381	-	-
SNORD18A	0.601	0.0139	1.02	1.43e-05	-	-
SNORD1A	1.62	9.42e-13	1.89	2.11e-16	-	-
SNORD1B	1.46	9.63e-10	1.74	3.54e-11	-	-
SNORD20	1.86	1.26e-11	1.66	8.22e-09	-	-
SNORD21	2.01	3.3e-19	2.34	1.33e-22	-	-
SNORD23	2.78	1.3e-08	3.06	4.87e-11	-	-
SNORD24	-1.69	2.18e-18	-1.26	8.48e-11	-	-
SNORD25	-1.53	1.27e-12	-1.18	5.98e-08	-	-
SNORD27	-1.15	2.11e-06	-1.03	1.23e-06	-	-
SNORD28	-2.8	2.29e-31	-2.25	5.54e-18	-	-
SNORD29	-2.24	1.16e-26	-2.09	1.07e-25	-	-
SNORD34	-1.43	2.27e-10	-1.19	1.92e-09	-	-
SNORD35B	1.01	2.45e-06	0.981	3.23e-06	-	-
SNORD36A	-1.88	4.81e-13	-1.32	4.28e-07	-	-
SNORD36C	0.557	0.0245	0.838	0.000209	-	-
SNORD38A	0.667	0.0161	0.911	0.000349	-	-
SNORD3C	-0.899	4.45e-05	-0.677	0.00827	-	-
SNORD41	-0.722	0.000981	-0.532	0.0284	-	-
SNORD43	0.819	4.45e-05	1.05	1.84e-08	-	-
SNORD45A	1.59	1.21e-13	1.56	8.21e-14	-	-
SNORD45B	2.46	2.31e-31	2.5	7.1e-28	-	-
SNORD47	-0.959	2.79e-06	-0.771	0.000501	-	-
SNORD48	-0.873	2.46e-05	-0.521	0.0166	-	-
SNORD49B	-0.994	0.000229	-0.902	0.00085	-	-
SNORD4A	0.963	1.14e-05	1.04	1.62e-05	-	-
SNORD4B	-1.77	1.69e-11	-1.62	6.12e-13	-	-
SNORD5	-1.4	2.12e-11	-1.41	8.58e-11	-	-
SNORD50B	2.45	7.74e-35	2.36	3.89e-28	-	-
SNORD51	1.82	3.39e-10	1.97	7.87e-10	-	-
SNORD52	0.6	0.00746	0.782	0.000434	-	-
SNORD53	2.59	3.26e-27	2.75	2.34e-32	-	-
SNORD53B	1.77	1.81e-17	2	1.39e-21	-	-
SNORD54	0.965	4.71e-05	1.06	2.34e-07	-	-
SNORD58A	-0.924	5.71e-06	-0.506	0.025	-	-
SNORD58C	-0.98	4.09e-06	-0.66	0.00394	-	-
SNORD59A	3.36	7.74e-56	3.24	2.14e-57	-	-
SNORD59B	1.41	8.81e-11	1.66	6.08e-14	-	-
SNORD60	0.706	0.000679	1.13	1.84e-08	-	-
SNORD61	0.854	0.000142	0.878	5.4e-05	-	-
SNORD63	1.24	5.1e-10	1.51	4.87e-14	-	-
SNORD63B	-	-	1.04	1.77e-06	-0.679	0.0116
SNORD66	3.12	2.88e-49	3.15	1.44e-53	-	-
SNORD68	0.992	7.89e-07	1.21	6.44e-09	-	-
SNORD7	1.12	1.93e-06	1.13	3.22e-07	-	-
SNORD70	1.42	4.78e-09	1.51	4.3e-12	-	-
SNORD70B	0.791	0.000876	0.757	0.000491	-	-
SNORD71	2.4	3.21e-31	2.15	3.51e-23	-	-
SNORD73A	0.762	0.000317	0.969	3.83e-06	-	-
SNORD74	-2.05	2.3e-20	-1.35	3.01e-11	-0.652	0.00258
SNORD75	-1.78	3.64e-17	-1.14	1.47e-07	-0.59	0.0134
SNORD76	-0.758	0.000226	-	-	-	-
SNORD77	-2	3.06e-19	-1.62	3.52e-12	-	-
SNORD78	-2.29	2.9e-27	-1.77	9.48e-15	-	-
SNORD79	-1.9	5.29e-16	-1.63	5.28e-12	-	-
SNORD8	1.49	2.78e-09	1.24	1.3e-07	-	-
SNORD82	2.38	6.26e-33	2.46	1.59e-35	-	-
SNORD84	2.61	6.64e-38	2.51	3.12e-37	-	-
SNORD85	2.36	5.86e-28	2.31	1.71e-31	-	-
SNORD86	-2.55	1.06e-14	-1.81	6.67e-09	-	-
SNORD88B	-0.847	0.000208	-	-	-	-
SNORD89	3.35	4.77e-40	3.23	2.35e-40	-	-
SNORD90	2.98	2.03e-34	2.94	3.06e-29	-	-
SNORD91A	0.832	0.000479	0.949	2.19e-05	-	-
SNORD91B	1.34	1.39e-10	1.45	6.69e-12	-	-
SNORD92	2.01	7.71e-21	1.98	2.01e-17	-	-
SNORD93	1.93	1.51e-21	2.01	3.6e-17	-	-
SNORD94	4.54	1.2e-26	4.11	1e-20	-	-
SNORD96A	0.685	0.00369	1.05	1.08e-05	-	-
SNORD99	-2.04	1.21e-20	-1.53	4.81e-11	-	-
